# Supplementary material for: Identification of Entry Factors Involved in Hepatitis C Virus Infection Based on Host-Mimicking Short Linear Motifs
Source: PubMed Central journal article supplement (PMC5302801; doi:10.1371/journal.pcbi.1005368), 2017-01-27
Supplement: pcbi.1005368.s001.pdf [file pcbi.1005368.s001.pdf]

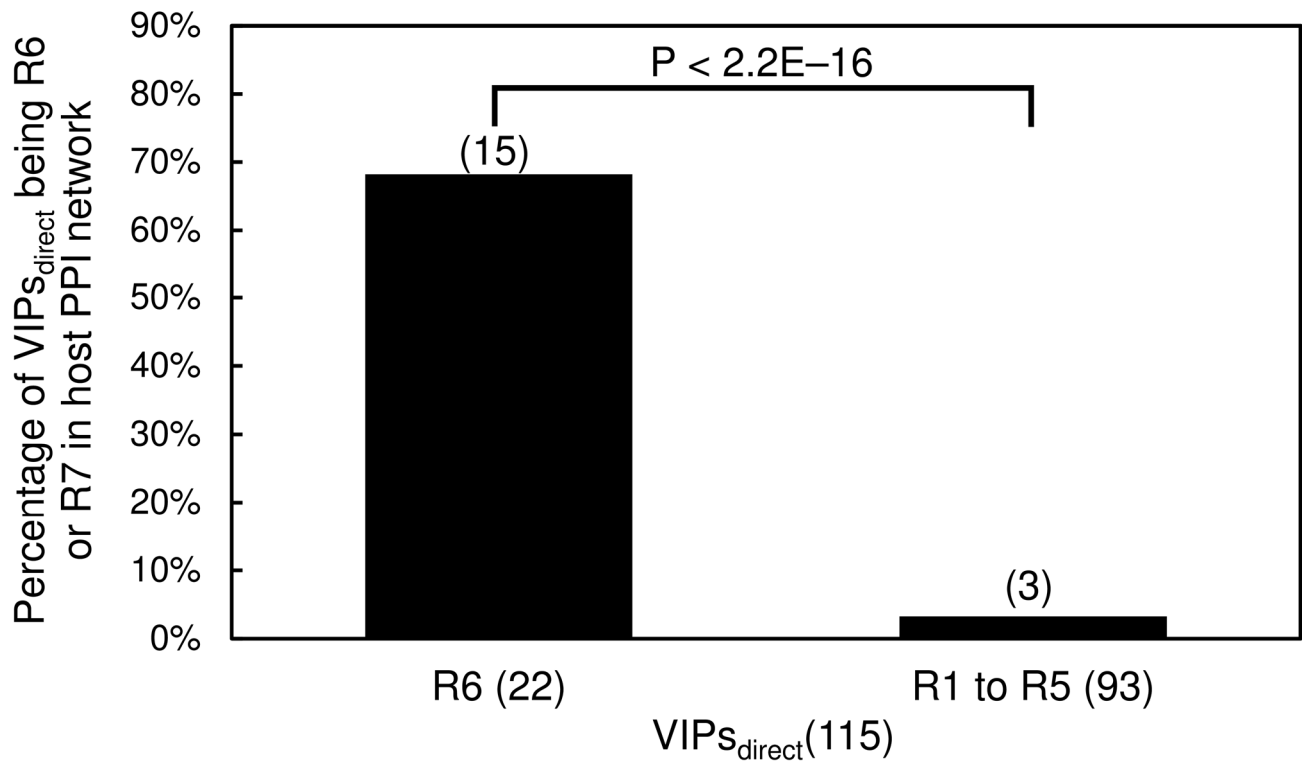

**S1 Fig. Statistical significance of VIPs<sub>direct</sub> being hub proteins (R6 or R7) in the host PPI network.** The P-value was computed using a binomial proportion test on the difference between the group of 22 R6 VIPs<sub>direct</sub> and that of the remaining 93 VIPs<sub>direct</sub>. On top of the bar is the number of VIPs<sub>direct</sub> that are also hub proteins (R6 or R7) in the host PPI network of liver cell surface proteins.
