# Supplementary material for: Identification of Entry Factors Involved in Hepatitis C Virus Infection Based on Host-Mimicking Short Linear Motifs
Source: PubMed Central journal article supplement (PMC5302801; doi:10.1371/journal.pcbi.1005368), 2017-01-27
Supplement: pcbi.1005368.s004.pdf [file pcbi.1005368.s004.pdf]

A. CLDN1

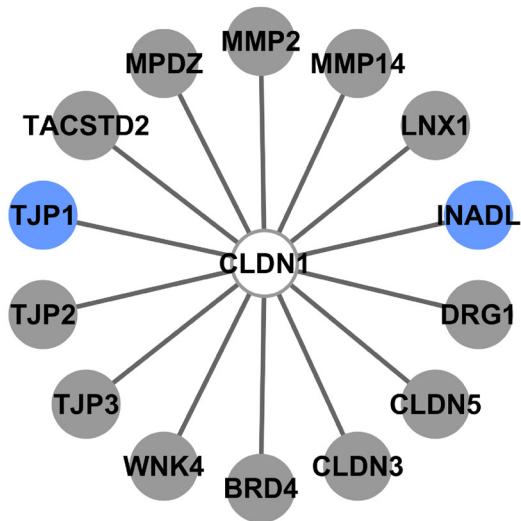

B. SCARB1

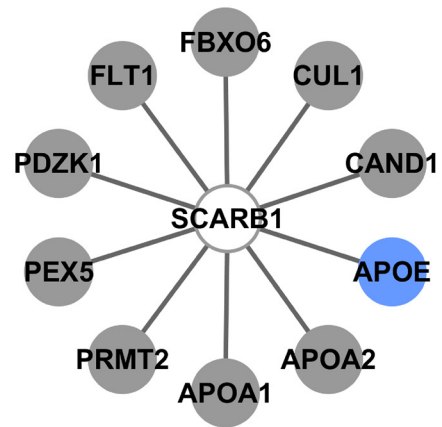

C. CD209

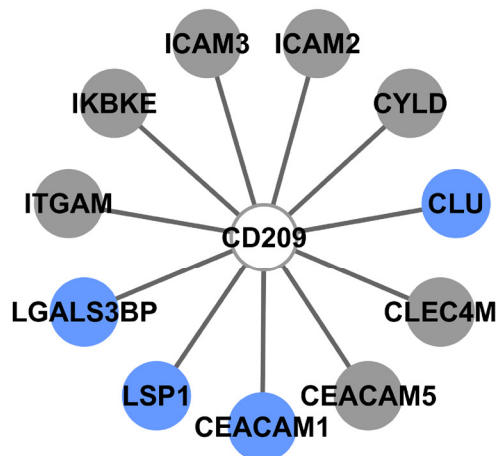

D. NPC1L1

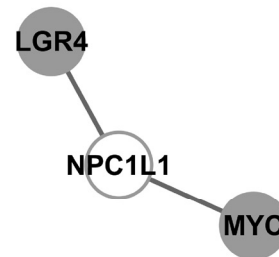

**S4 Fig. Four known entry factors (white nodes) of HCV infection not identified in this work. (A) CLDN1; (B) SCARB1; (C) CD209; (D) NPC1L1. Blue nodes are VIP<sub>Sindirect</sub>; gray nodes are not VIPs. The connections between the nodes represent physical interactions extracted from HIPPIE (Schaefer et al. (2012) *PLoS ONE*, 7(2), e31826).**
