# Supplementary material for: Identification of Entry Factors Involved in Hepatitis C Virus Infection Based on Host-Mimicking Short Linear Motifs
Source: PubMed Central journal article supplement (PMC5302801; doi:10.1371/journal.pcbi.1005368), 2017-01-27
Supplement: pcbi.1005368.s009.pdf [file pcbi.1005368.s009.pdf]

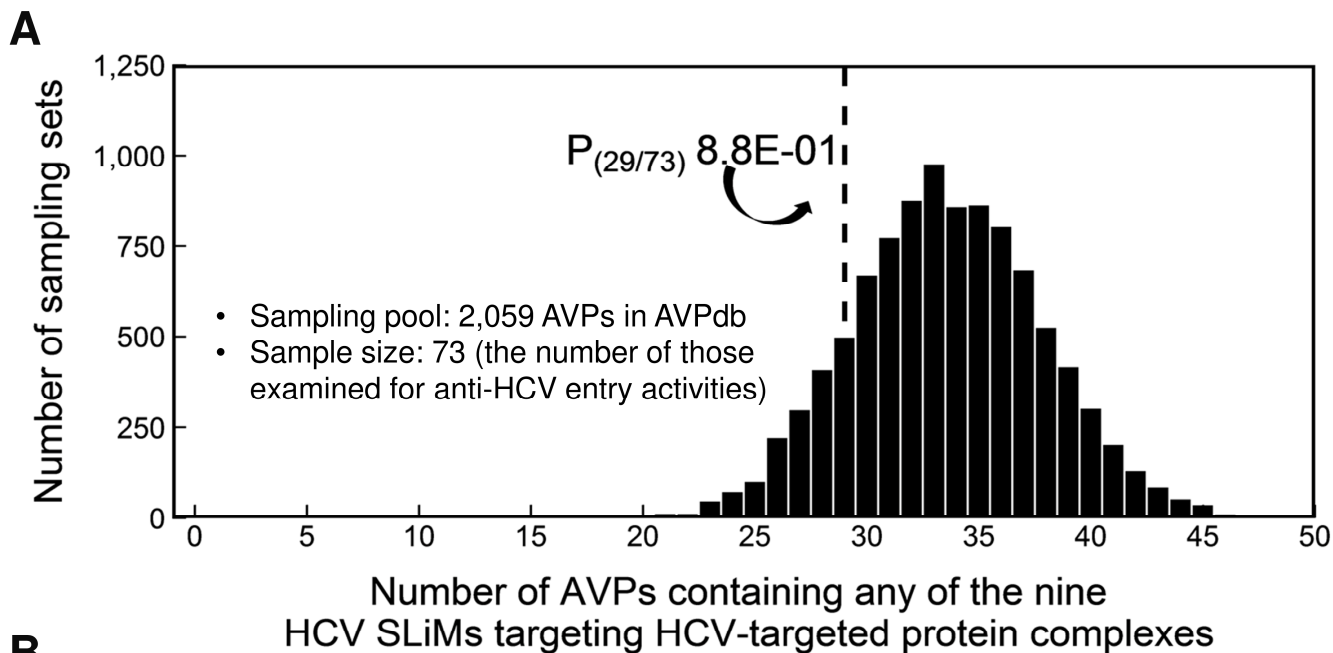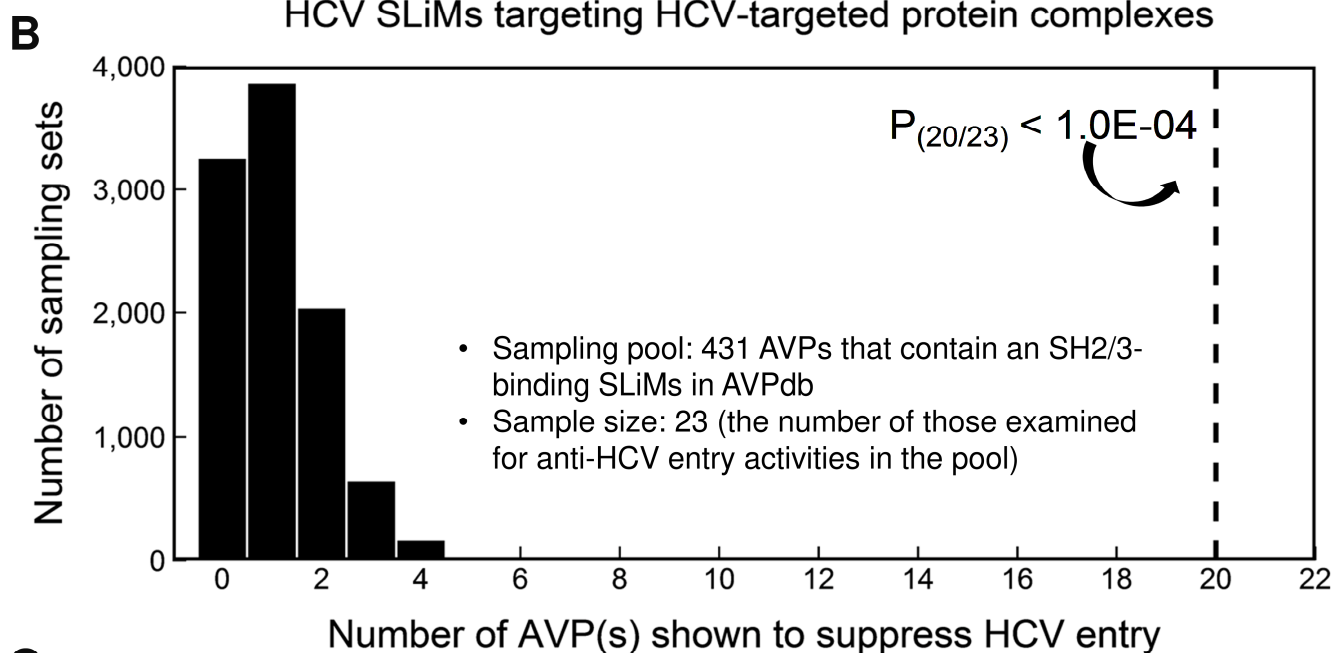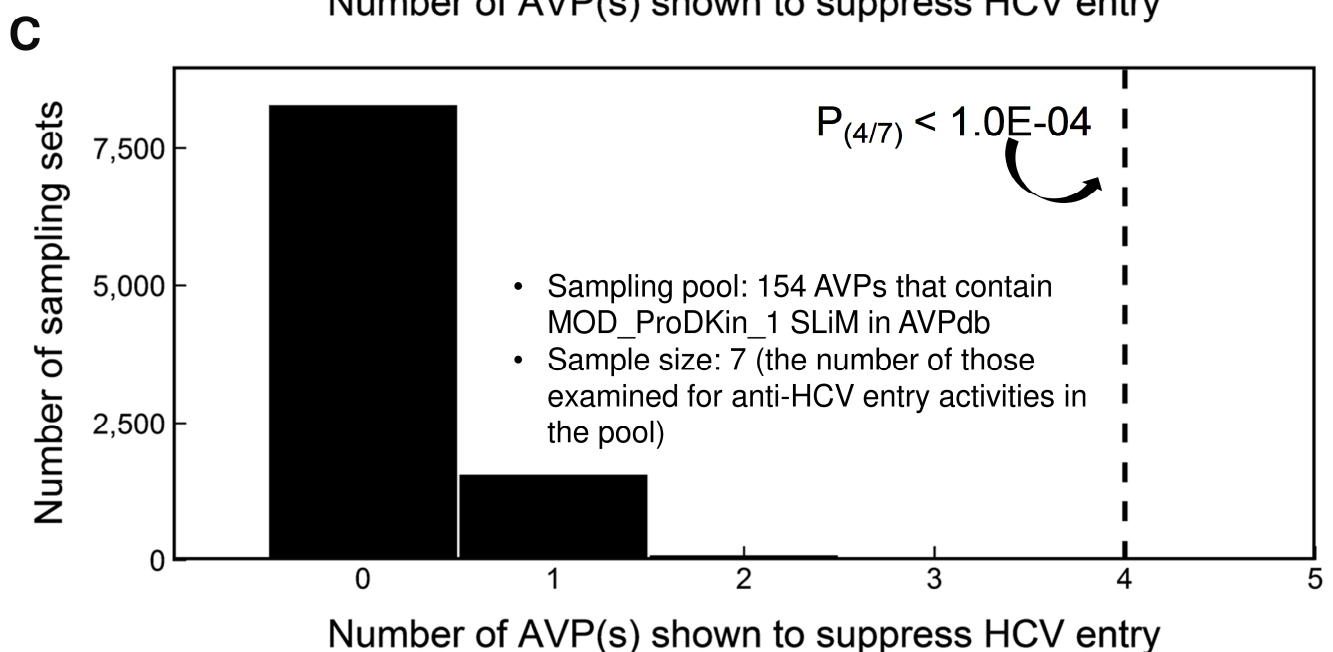

**S9 Fig. Statistical significance of SLiM-containing AVPs.** (A) Of the 73 AVPs that were tested for entry-related anti-HCV activities in AVPdb, 29 harbor an HCV E1/E2 SLiM (one of nine) that can bind to VIPs found in the six main groups of HCV-targeted protein complexes (Fig. 4); here, the number of AVPs containing at least one of the nine SLiMs for all sample sets, each consisting of 73 AVPs randomly sampled from a pool of 2059 AVPs (the total number of AVPs in AVPdb), was counted. (B) In this test, the sampling pool was the set of the 431 AVPs found to contain LIG\_SH2\_STAT5 and/or LIG\_SH3\_3 in AVPdb; the sample size was 23, of which those shown to be effective in inhibiting HCV entry in AVPdb were counted. (C) In this test, the sampling pool was the set of the 154 AVPs found to contain MOD\_ProDKin\_1 in AVPdb; the sample size was 7, of which those shown to be effective in inhibiting HCV entry in AVPdb were counted. For (A), (B) and (C), the statistics was calculated based on 10,000 sample sets.
