# Supplementary material for: Identification of Entry Factors Involved in Hepatitis C Virus Infection Based on Host-Mimicking Short Linear Motifs
Source: PubMed Central journal article supplement (PMC5302801; doi:10.1371/journal.pcbi.1005368), 2017-01-27
Supplement: pcbi.1005368.s010.pdf [file pcbi.1005368.s010.pdf]

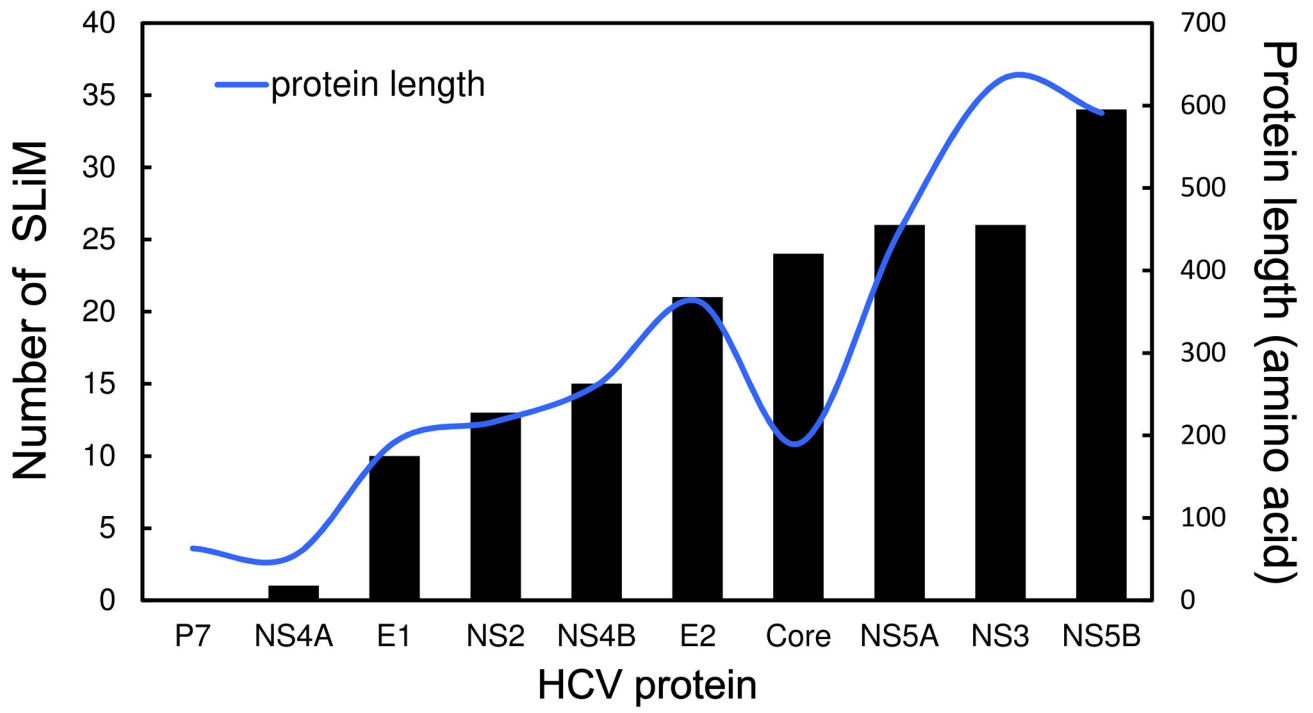

**S10 Fig. The number of conserved (in  $\geq 70\%$  sequences) SLiMs found in HCV component proteins and protein length.**
