# Supplementary material for: Identification of Entry Factors Involved in Hepatitis C Virus Infection Based on Host-Mimicking Short Linear Motifs
Source: PubMed Central journal article supplement (PMC5302801; doi:10.1371/journal.pcbi.1005368), 2017-01-27
Supplement: pcbi.1005368.s014.pdf [file pcbi.1005368.s014.pdf]

**S4 Table. Types of PPIs between HCV polyprotein and human protein in PHISTO and their detection methods**

| <b>PPI</b> | <b>HCV protein</b> | <b>Human protein</b> | <b>Detection method(s)*</b>                                                                                                                         | <b>PPI type*</b> |
|------------|--------------------|----------------------|-----------------------------------------------------------------------------------------------------------------------------------------------------|------------------|
| 1          | Polyprotein        | FGB                  | <b>bimolecular fluorescence complementation, two hybrid</b> , anti tag coimmunoprecipitation, confocal microscopy                                   | Direct           |
| 2          | Polyprotein        | ANXA2                | <b>bimolecular fluorescence complementation, electron microscopy</b> , anti bait coimmunoprecipitation, confocal microscopy                         | Direct           |
| 3          | Polyprotein        | CD81                 | <b>competition binding, enzyme linked immunosorbent assay, far western blotting, fluorescence-activated cell sorting, pull down</b> , other methods | Direct           |
| 4          | Polyprotein        | LTBR                 | <b>cosedimentation through density gradient, far western blotting, pull down, two hybrid</b>                                                        | Direct           |
| 5          | Polyprotein        | SCARB1               | <b>cross-linking study, fluorescence-activated cell sorting</b>                                                                                     | Direct           |
| 6          | Polyprotein        | ACTB                 | <b>electron microscopy</b> , anti bait coimmunoprecipitation, confocal microscopy                                                                   | Direct           |
| 7          | Polyprotein        | RAB18                | <b>electron microscopy, pull down</b> , imaging technique                                                                                           | Direct           |
| 8          | Polyprotein        | GRB2                 | <b>enzyme linked immunosorbent assay, pull down</b> , anti bait coimmunoprecipitation                                                               | Direct           |
| 9          | Polyprotein        | HCK                  | <b>enzyme linked immunosorbent assay, protein kinase assay, pull down</b> , anti bait coimmunoprecipitation                                         | Direct           |
| 10         | Polyprotein        | LTF                  | <b>far western blotting, pull down</b> , anti bait coimmunoprecipitation, coimmunoprecipitation                                                     | Direct           |
| 11         | Polyprotein        | CD209                | <b>fluorescence-activated cell sorting, surface plasmon resonance</b>                                                                               | Direct           |
| 12         | Polyprotein        | EBAG9                | <b>protein array</b>                                                                                                                                | Direct           |

**S4 Table. Types of PPIs between HCV polyprotein and human protein in PHISTO and their detection methods (continued)**

| <b>PPI</b> | <b>HCV protein</b> | <b>Human protein</b> | <b>Detection method(s)*</b>                                                                                                                                      | <b>PPI type*</b> |
|------------|--------------------|----------------------|------------------------------------------------------------------------------------------------------------------------------------------------------------------|------------------|
| 13         | Polyprotein        | CTTN                 | <b>protein array</b>                                                                                                                                             | Direct           |
| 14         | Polyprotein        | CSNK2A2              | <b>protein array</b>                                                                                                                                             | Direct           |
| 15         | Polyprotein        | HRAS                 | <b>protein array</b>                                                                                                                                             | Direct           |
| 16         | Polyprotein        | CALU                 | <b>protein array</b>                                                                                                                                             | Direct           |
| 17         | Polyprotein        | PDAP1                | <b>protein array</b>                                                                                                                                             | Direct           |
| 18         | Polyprotein        | RPL29                | <b>protein array</b>                                                                                                                                             | Direct           |
| 19         | Polyprotein        | PLSCR1               | <b>pull down, two hybrid</b> , anti tag coimmunoprecipitation                                                                                                    | Direct           |
| 20         | Polyprotein        | SORBS2               | <b>pull down, two hybrid</b> , other methods, anti tag coimmunoprecipitation                                                                                     | Direct           |
| 21         | Polyprotein        | BIN1                 | <b>pull down, two hybrid</b> , other methods, anti bait coimmunoprecipitation, anti tag coimmunoprecipitation, confocal microscopy, tandem affinity purification | Direct           |
| 22         | Polyprotein        | EFEMP1               | <b>pull down, two hybrid</b> , other methods, anti tag coimmunoprecipitation                                                                                     | Direct           |
| 23         | Polyprotein        | VAPA                 | <b>pull down, two hybrid</b> , anti tag coimmunoprecipitation, coimmunoprecipitation, confocal microscopy, tandem affinity purification                          | Direct           |
| 24         | Polyprotein        | NCL                  | <b>pull down</b> , confocal microscopy                                                                                                                           | Direct           |
| 25         | Polyprotein        | DHCR24               | <b>pull down</b>                                                                                                                                                 | Direct           |
| 26         | Polyprotein        | FAS                  | <b>pull down</b> , anti bait coimmunoprecipitation, confocal microscopy                                                                                          | Direct           |
| 27         | Polyprotein        | TGFBR1               | <b>pull down</b> , other methods, anti tag coimmunoprecipitation, confocal microscopy                                                                            | Direct           |
| 28         | Polyprotein        | FN1                  | <b>pull down, two hybrid</b> , other methods                                                                                                                     | Direct           |
| 29         | Polyprotein        | NUCB1                | <b>pull down, two hybrid</b> , other methods                                                                                                                     | Direct           |
| 30         | Polyprotein        | APOA2                | <b>surface plasmon resonance, two hybrid</b> , other methods                                                                                                     | Direct           |
| 31         | Polyprotein        | AHNAK                | <b>two hybrid</b>                                                                                                                                                | Direct           |

**S4 Table. Types of PPIs between HCV polyprotein and human protein in PHISTO and their detection methods (continued)**

| <b>PPI</b> | <b>HCV protein</b> | <b>Human protein</b> | <b>Detection method(s)*</b>                                                                                                 | <b>PPI type*</b> |
|------------|--------------------|----------------------|-----------------------------------------------------------------------------------------------------------------------------|------------------|
| 32         | Polyprotein        | AGRN                 | <b>two hybrid</b>                                                                                                           | Direct           |
| 33         | Polyprotein        | AXIN1                | <b>two hybrid</b> , other methods                                                                                           | Direct           |
| 34         | Polyprotein        | LAMA5                | <b>two hybrid</b>                                                                                                           | Direct           |
| 35         | Polyprotein        | SLC31A2              | <b>two hybrid</b>                                                                                                           | Direct           |
| 36         | Polyprotein        | SORBS3               | <b>two hybrid</b> , other methods                                                                                           | Direct           |
| 37         | Polyprotein        | SRPX2                | <b>two hybrid</b>                                                                                                           | Direct           |
| 38         | Polyprotein        | SLIT3                | <b>two hybrid</b>                                                                                                           | Direct           |
| 39         | Polyprotein        | SPN                  | <b>two hybrid</b>                                                                                                           | Direct           |
| 40         | Polyprotein        | RBP1                 | <b>two hybrid</b>                                                                                                           | Direct           |
| 41         | Polyprotein        | EFEMP2               | <b>two hybrid</b>                                                                                                           | Direct           |
| 42         | Polyprotein        | VWF                  | <b>two hybrid</b>                                                                                                           | Direct           |
| 43         | Polyprotein        | GAPDH                | <b>two hybrid</b>                                                                                                           | Direct           |
| 44         | Polyprotein        | ITGB1                | <b>two hybrid</b>                                                                                                           | Direct           |
| 45         | Polyprotein        | PFN1                 | <b>two hybrid</b>                                                                                                           | Direct           |
| 46         | Polyprotein        | COL4A2               | <b>two hybrid</b>                                                                                                           | Direct           |
| 47         | Polyprotein        | VIM                  | <b>two hybrid</b> , confocal microscopy                                                                                     | Direct           |
| 48         | Polyprotein        | C7                   | <b>two hybrid</b>                                                                                                           | Direct           |
| 49         | Polyprotein        | VCAN                 | <b>two hybrid</b>                                                                                                           | Direct           |
| 50         | Polyprotein        | NID1                 | <b>two hybrid</b>                                                                                                           | Direct           |
| 51         | Polyprotein        | PKM2                 | <b>two hybrid</b> , other methods, anti bait coimmunoprecipitation, anti tag coimmunoprecipitation, fluorescence microscopy | Direct           |
| 52         | Polyprotein        | FBLN1                | <b>two hybrid</b>                                                                                                           | Direct           |
| 53         | Polyprotein        | TBXAS1               | <b>two hybrid</b> , other methods                                                                                           | Direct           |
| 54         | Polyprotein        | GRN                  | <b>two hybrid</b>                                                                                                           | Direct           |
| 55         | Polyprotein        | CTGF                 | <b>two hybrid</b>                                                                                                           | Direct           |
| 56         | Polyprotein        | FBN1                 | <b>two hybrid</b>                                                                                                           | Direct           |
| 57         | Polyprotein        | STAT3                | <b>two hybrid</b>                                                                                                           | Direct           |
| 58         | Polyprotein        | MLLT4                | <b>two hybrid</b>                                                                                                           | Direct           |
| 59         | Polyprotein        | LAMB2                | <b>two hybrid</b>                                                                                                           | Direct           |
| 60         | Polyprotein        | BCAR1                | <b>two hybrid</b>                                                                                                           | Direct           |
| 61         | Polyprotein        | B2M                  | <b>two hybrid</b> , other methods                                                                                           | Direct           |
| 62         | Polyprotein        | FBLN2                | <b>two hybrid</b>                                                                                                           | Direct           |
| 63         | Polyprotein        | MAPK7                | <b>two hybrid</b>                                                                                                           | Direct           |

**S4 Table. Types of PPIs between HCV polyprotein and human protein in PHISTO and their detection methods (continued)**

| <b>PPI</b> | <b>HCV protein</b> | <b>Human protein</b> | <b>Detection method(s)*</b>                                                                              | <b>PPI type*</b> |
|------------|--------------------|----------------------|----------------------------------------------------------------------------------------------------------|------------------|
| 64         | Polyprotein        | NID2                 | <b>two hybrid</b>                                                                                        | Direct           |
| 65         | Polyprotein        | FBN3                 | <b>two hybrid</b>                                                                                        | Direct           |
| 66         | Polyprotein        | CADPS2               | <b>two hybrid</b> , other methods                                                                        | Direct           |
| 67         | Polyprotein        | LTBP4                | <b>two hybrid</b>                                                                                        | Direct           |
| 68         | Polyprotein        | ALB                  | <b>two hybrid</b> , other methods                                                                        | Direct           |
| 69         | Polyprotein        | NRP1                 | <b>two hybrid</b>                                                                                        | Direct           |
| 70         | Polyprotein        | PDLIM5               | <b>two hybrid</b>                                                                                        | Direct           |
| 71         | Polyprotein        | LRRC7                | <b>two hybrid</b> , other methods                                                                        | Direct           |
| 72         | Polyprotein        | NRP2                 | <b>two hybrid</b>                                                                                        | Direct           |
| 73         | Polyprotein        | SHARPIN              | <b>two hybrid</b> , other methods                                                                        | Direct           |
| 74         | Polyprotein        | FXYD6                | <b>two hybrid</b>                                                                                        | Direct           |
| 75         | Polyprotein        | MMRN2                | <b>two hybrid</b>                                                                                        | Direct           |
| 76         | Polyprotein        | PARVG                | <b>two hybrid</b> , other methods                                                                        | Direct           |
| 77         | Polyprotein        | SPON1                | <b>two hybrid</b>                                                                                        | Direct           |
| 78         | Polyprotein        | CELSR2               | <b>two hybrid</b>                                                                                        | Direct           |
| 79         | Polyprotein        | PNPLA8               | <b>two hybrid</b>                                                                                        | Direct           |
| 80         | Polyprotein        | PICK1                | <b>two hybrid</b>                                                                                        | Direct           |
| 81         | Polyprotein        | STAB1                | <b>two hybrid</b>                                                                                        | Direct           |
| 82         | Polyprotein        | RAI14                | <b>two hybrid</b> , other methods                                                                        | Direct           |
| 83         | Polyprotein        | FBLN5                | <b>two hybrid</b>                                                                                        | Direct           |
| 84         | Polyprotein        | SSX2IP               | <b>two hybrid</b>                                                                                        | Direct           |
| 85         | Polyprotein        | MAGED1               | <b>two hybrid</b> , other methods                                                                        | Direct           |
| 86         | Polyprotein        | LAMC3                | <b>two hybrid</b>                                                                                        | Direct           |
| 87         | Polyprotein        | PLIN3                | <b>two hybrid</b> , anti bait coimmunoprecipitation, anti tag coimmunoprecipitation, confocal microscopy | Direct           |
| 88         | Polyprotein        | CD63                 | <b>two hybrid</b>                                                                                        | Direct           |
| 89         | Polyprotein        | FCN2                 | <b>two hybrid</b>                                                                                        | Direct           |
| 90         | Polyprotein        | RBP4                 | <b>two hybrid</b>                                                                                        | Direct           |
| 91         | Polyprotein        | HAMP                 | <b>two hybrid</b>                                                                                        | Direct           |
| 92         | Polyprotein        | PTGS2                | <b>two hybrid</b>                                                                                        | Direct           |
| 93         | Polyprotein        | CD82                 | <b>two hybrid</b>                                                                                        | Direct           |
| 94         | Polyprotein        | APOA1                | <b>two hybrid</b>                                                                                        | Direct           |
| 95         | Polyprotein        | APLP2                | <b>two hybrid</b>                                                                                        | Direct           |

**S4 Table. Types of PPIs between HCV polyprotein and human protein in PHISTO and their detection methods (continued)**

| <b>PPI</b> | <b>HCV protein</b> | <b>Human protein</b> | <b>Detection method(s)*</b>                                                                           | <b>PPI type*</b> |
|------------|--------------------|----------------------|-------------------------------------------------------------------------------------------------------|------------------|
| 96         | Polyprotein        | FGG                  | <b>two hybrid</b>                                                                                     | Direct           |
| 97         | Polyprotein        | SLC39A1              | <b>two hybrid</b>                                                                                     | Direct           |
| 98         | Polyprotein        | PIIB                 | <b>two hybrid</b>                                                                                     | Direct           |
| 99         | Polyprotein        | SERPINA1             | <b>two hybrid</b>                                                                                     | Direct           |
| 100        | Polyprotein        | LRG1                 | <b>two hybrid</b>                                                                                     | Direct           |
| 101        | Polyprotein        | ENO1                 | <b>two hybrid</b> , tandem affinity purification                                                      | Direct           |
| 102        | Polyprotein        | EEF1G                | <b>two hybrid</b>                                                                                     | Direct           |
| 103        | Polyprotein        | SLC4A2               | <b>two hybrid</b>                                                                                     | Direct           |
| 104        | Polyprotein        | AZGP1                | <b>two hybrid</b>                                                                                     | Direct           |
| 105        | Polyprotein        | APOB                 | <b>two hybrid</b> , anti bait coimmunoprecipitation                                                   | Direct           |
| 106        | Polyprotein        | PDIA6                | <b>two hybrid</b>                                                                                     | Direct           |
| 107        | Polyprotein        | PON3                 | <b>two hybrid</b>                                                                                     | Direct           |
| 108        | Polyprotein        | FGL1                 | <b>two hybrid</b>                                                                                     | Direct           |
| 109        | Polyprotein        | F2                   | <b>two hybrid</b>                                                                                     | Direct           |
| 110        | Polyprotein        | SEP2                 | <b>two hybrid</b> , anti bait coimmunoprecipitation, anti tag coimmunoprecipitation                   | Direct           |
| 111        | Polyprotein        | FMNL1                | <b>two hybrid</b>                                                                                     | Direct           |
| 112        | Polyprotein        | VAPB                 | <b>two hybrid</b> , anti tag coimmunoprecipitation, confocal microscopy, tandem affinity purification | Direct           |
| 113        | Polyprotein        | CDC42BPA             | <b>two hybrid</b>                                                                                     | Direct           |
| 114        | Polyprotein        | APOH                 | <b>two hybrid</b>                                                                                     | Direct           |
| 115        | Polyprotein        | CTNNB1               | <b>two hybrid</b>                                                                                     | Direct           |
| 116        | Polyprotein        | NUCB2                | <b>two hybrid</b>                                                                                     | Direct           |
| 117        | Polyprotein        | RNASET2              | <b>two hybrid</b>                                                                                     | Direct           |
| 118        | Polyprotein        | PIK3R1               | <b>two hybrid</b>                                                                                     | Direct           |
| 119        | Polyprotein        | SPTAN1               | <b>two hybrid</b>                                                                                     | Direct           |
| 120        | Polyprotein        | DST                  | <b>two hybrid</b>                                                                                     | Direct           |
| 121        | Polyprotein        | SCP2                 | <b>two hybrid</b>                                                                                     | Direct           |
| 122        | Polyprotein        | SLMAP                | <b>two hybrid, other methods</b>                                                                      | Direct           |
| 123        | Polyprotein        | SERPIND1             | <b>two hybrid</b>                                                                                     | Direct           |

**S4 Table. Types of PPIs between HCV polyprotein and human protein in PHISTO and their detection methods (continued)**

| <b>PPI</b> | <b>HCV protein</b> | <b>Human protein</b> | <b>Detection method(s)*</b>                                      | <b>PPI type*</b> |
|------------|--------------------|----------------------|------------------------------------------------------------------|------------------|
| 124        | Polyprotein        | TF                   | <b>two hybrid</b>                                                | Direct           |
| 125        | Polyprotein        | HMGCR                | <b>two hybrid</b>                                                | Direct           |
| 126        | Polyprotein        | C3                   | <b>two hybrid</b>                                                | Direct           |
| 127        | Polyprotein        | APOE                 | <b>two hybrid</b>                                                | Direct           |
| 128        | Polyprotein        | TNFRSF10B            | <b>two hybrid</b>                                                | Direct           |
| 129        | Polyprotein        | STX8                 | <b>two hybrid</b>                                                | Direct           |
| 130        | Polyprotein        | AGGF1                | <b>two hybrid</b>                                                | Direct           |
| 131        | Polyprotein        | MST1                 | <b>two hybrid</b> , other methods                                | Direct           |
| 132        | Polyprotein        | UTRN                 | <b>two hybrid</b>                                                | Direct           |
| 133        | Polyprotein        | CFH                  | <b>two hybrid</b>                                                | Direct           |
| 134        | Polyprotein        | HRG                  | <b>two hybrid</b>                                                | Direct           |
| 135        | Polyprotein        | APOA5                | <b>two hybrid</b>                                                | Direct           |
| 136        | Polyprotein        | C4A                  | <b>two hybrid</b>                                                | Direct           |
| 137        | Polyprotein        | SERPING1             | other methods                                                    | Direct/indirect  |
| 138        | Polyprotein        | VPS35                | other methods                                                    | Direct/indirect  |
| 139        | Polyprotein        | FLNA                 | anti bait coimmunoprecipitation,<br>confocal microscopy          | Direct/indirect  |
| 140        | Polyprotein        | CANX                 | anti bait coimmunoprecipitation,<br>confocal microscopy          | Direct/indirect  |
| 141        | Polyprotein        | STX12                | anti bait coimmunoprecipitation                                  | Direct/indirect  |
| 142        | Polyprotein        | SSB                  | anti bait coimmunoprecipitation,<br>tandem affinity purification | Direct/indirect  |
| 143        | Polyprotein        | HSP90AA1             | anti tag coimmunoprecipitation                                   | Direct/indirect  |
| 144        | Polyprotein        | RAB5A                | anti tag coimmunoprecipitation                                   | Direct/indirect  |
| 145        | Polyprotein        | TGFBR2               | anti tag coimmunoprecipitation                                   | Direct/indirect  |
| 146        | Polyprotein        | OSBP2                | anti tag coimmunoprecipitation,<br>imaging technique             | Direct/indirect  |
| 147        | Polyprotein        | TLR2                 | confocal microscopy                                              | Direct/indirect  |
| 148        | Polyprotein        | C1QBP                | confocal microscopy                                              | Direct/indirect  |
| 149        | Polyprotein        | RAB5B                | fluorescence microscopy                                          | Direct/indirect  |
| 150        | Polyprotein        | TXN                  | tandem affinity purification                                     | Direct/indirect  |
| 151        | Polyprotein        | BASP1                | tandem affinity purification                                     | Direct/indirect  |
| 152        | Polyprotein        | MARCKS               | tandem affinity purification                                     | Direct/indirect  |
| 153        | Polyprotein        | HSPD1                | tandem affinity purification                                     | Direct/indirect  |
| 154        | Polyprotein        | HSPA5                | tandem affinity purification                                     | Direct/indirect  |

**S4 Table. Types of PPIs between HCV polyprotein and human protein in PHISTO and their detection methods (continued)**

| <b>PPI</b> | <b>HCV protein</b> | <b>Human protein</b> | <b>Detection method(s)*</b>  | <b>PPI type*</b> |
|------------|--------------------|----------------------|------------------------------|------------------|
| 155        | Polyprotein        | MIF                  | tandem affinity purification | Direct/indirect  |
| 156        | Polyprotein        | TUBB                 | tandem affinity purification | Direct/indirect  |
| 157        | Polyprotein        | IRS4                 | tandem affinity purification | Direct/indirect  |
| 158        | Polyprotein        | P4HB                 | tandem affinity purification | Direct/indirect  |

\*PPIs detected by at least one bold-faced experimental methods are considered “direct”, and “direct/indirect” otherwise. Methods detecting binary interaction, i.e. “direct” PPIs, are: bimolecular fluorescence complementation (26681426), competition binding (23235262), cross-linking study (7708014), electron microscopy (11785754), enzyme linked immunosorbent assay (11906746), far western blotting (18079728), fluorescence-activated cell sorting (11988464), protein array (16629388), protein kinase assay (7708014), pull down (26681426), surface plasmon resonance (7708014), two hybrid (26681426); methods detecting co-complex or non-binary interactions are considered “Direct/indirect” PPIs: anti bait coimmunoprecipitation (18369874), anti tag coimmunoprecipitation (18369874), coimmunoprecipitation (18369874), tandem affinity purification (17640003), cosedimentation through density gradient (7708014), confocal microscopy (17640003), fluorescence microscopy (17640003), imaging technique (17640003), other methods (Not available). Numbers in parentheses are Pubmed ID for the reference that describes the experimental method.
