# Supplementary material for: Identification of Entry Factors Involved in Hepatitis C Virus Infection Based on Host-Mimicking Short Linear Motifs
Source: PubMed Central journal article supplement (PMC5302801; doi:10.1371/journal.pcbi.1005368), 2017-01-27
Supplement: pcbi.1005368.s016.pdf [file pcbi.1005368.s016.pdf]

**S6 Table. KEGG pathways enriched in the six main protein complex groups**

| KEGG category                           | ID                    | Description                       | P-value of enrichment in complex group |         |         |         |         |         | Main functional class |                     |                        |
|-----------------------------------------|-----------------------|-----------------------------------|----------------------------------------|---------|---------|---------|---------|---------|-----------------------|---------------------|------------------------|
|                                         |                       |                                   | A                                      | B       | C       | D       | E       | F       | Entry                 | Carcino-<br>genesis | Infectious<br>diseases |
| 4.1 Transport and catabolism            | hsa04144              | Endocytosis                       |                                        |         | 4.8E-11 |         |         | 3.9E-08 |                       |                     |                        |
|                                         | hsa04145              | Phagosome                         | 5.4E-05                                |         |         |         |         |         |                       |                     |                        |
| 4.2 Cell motility                       | hsa04810              | Regulation of actin cytoskeleton  |                                        | 2.0E-06 |         |         |         | 3.8E-12 |                       |                     |                        |
| 4.4 Cellular community                  | hsa04510              | Focal adhesion                    |                                        | 1.7E-06 |         | 2.9E-06 |         | 6.7E-20 |                       |                     |                        |
|                                         | hsa04520              | Adherens junction                 |                                        |         | 7.6E-07 | 6.5E-09 |         | 2.6E-08 |                       |                     |                        |
|                                         | hsa04530              | Tight junction                    |                                        |         | 1.1E-06 | 8.3E-05 |         |         |                       |                     |                        |
|                                         | hsa04540              | Gap junction                      |                                        |         |         |         |         | 1.8E-04 |                       |                     |                        |
| 3.2 Signal transduction                 | hsa04010              | MAPK signaling pathway            |                                        |         |         |         | 8.4E-06 | 7.7E-05 |                       |                     |                        |
|                                         | hsa04012              | ErbB signaling pathway            |                                        |         |         |         |         | 1.6E-18 |                       |                     |                        |
|                                         | hsa04014              | Ras signaling pathway             |                                        |         |         |         |         | 8.1E-12 |                       |                     |                        |
|                                         | hsa04015              | Rap1 signaling pathway            |                                        |         | 5.3E-08 |         |         | 3.6E-10 |                       |                     |                        |
|                                         | hsa04020              | Calcium signaling pathway         |                                        |         |         |         |         | 2.1E-04 |                       |                     |                        |
|                                         | hsa04064              | NF-kappa B signaling pathway      |                                        |         |         |         | 8.8E-07 |         |                       |                     |                        |
|                                         | hsa04066              | HIF-1 signaling pathway           |                                        |         |         |         |         | 3.5E-07 |                       |                     |                        |
|                                         | hsa04068              | FoxO signaling pathway            |                                        |         |         |         |         | 3.2E-07 |                       |                     |                        |
|                                         | hsa04071              | Sphingolipid signaling pathway    |                                        |         |         |         |         | 8.0E-04 |                       |                     |                        |
|                                         | hsa04072              | Phospholipase D signaling pathway |                                        |         |         |         |         | 3.3E-11 |                       |                     |                        |
|                                         | hsa04150              | mTOR signaling pathway            |                                        |         |         |         |         | 2.7E-04 |                       |                     |                        |
|                                         | hsa04151              | PI3K-Akt signaling pathway        |                                        | 1.1E-04 |         |         |         | 2.7E-09 |                       |                     |                        |
|                                         | hsa04350              | TGF-beta signaling pathway        |                                        |         | 1.2E-06 |         |         |         |                       |                     |                        |
|                                         | hsa04390              | Hippo signaling pathway           |                                        |         | 1.5E-10 |         |         |         |                       |                     |                        |
| hsa04668                                | TNF signaling pathway |                                   |                                        |         |         | 1.7E-05 |         |         |                       |                     |                        |
| 3.3 Signaling molecules and interaction | hsa04512              | ECM-receptor interaction          |                                        | 1.7E-06 |         |         |         |         |                       |                     |                        |
| 4.3 Cell growth and death               | hsa04210              | Apoptosis                         |                                        |         |         |         | 5.2E-05 |         |                       |                     |                        |

**S6 Table. KEGG pathways enriched in the six main protein complex groups (continued)**

| KEGG category                        | ID       | Description                                          | P-value of enrichment in complex group |         |         |         |         |         | Main functional class |                     |                        |  |
|--------------------------------------|----------|------------------------------------------------------|----------------------------------------|---------|---------|---------|---------|---------|-----------------------|---------------------|------------------------|--|
|                                      |          |                                                      | A                                      | B       | C       | D       | E       | F       | Entry                 | Carcino-<br>genesis | Infectious<br>diseases |  |
| 5.1 Immune system                    | hsa04612 | Antigen processing and presentation                  | 3.5E-10                                |         |         |         |         |         |                       |                     |                        |  |
|                                      | hsa04620 | Toll-like receptor signaling pathway                 |                                        |         |         |         |         | 1.7E-06 |                       |                     |                        |  |
|                                      | hsa04622 | RIG-I-like receptor signaling pathway                |                                        |         |         |         |         | 1.8E-07 |                       |                     |                        |  |
| 5.2 Endocrine system                 | hsa04910 | Insulin signaling pathway                            |                                        |         |         |         |         |         |                       | 3.9E-07             |                        |  |
|                                      | hsa04915 | Estrogen signaling pathway                           |                                        |         |         |         |         |         |                       | 1.3E-09             |                        |  |
|                                      | hsa04917 | Prolactin signaling pathway                          |                                        |         |         |         |         |         |                       | 3.2E-07             |                        |  |
|                                      | hsa04920 | Adipocytokine signaling pathway                      |                                        |         |         |         |         | 1.7E-05 |                       |                     |                        |  |
| 6.7 Endocrine and metabolic diseases | hsa04931 | Insulin resistance                                   |                                        |         |         |         |         |         |                       | 6.7E-05             |                        |  |
|                                      | hsa04933 | AGE-RAGE signaling pathway in diabetic complications |                                        |         | 5.0E-09 |         |         |         |                       |                     |                        |  |
| 5.9 Aging                            | hsa04213 | Longevity regulating pathway – multiple species      |                                        |         |         |         |         |         |                       | 3.4E-04             |                        |  |
| 6.1 Cancers: Overview                | hsa05200 | Pathways in cancer                                   |                                        |         | 4.7E-04 |         |         | 8.6E-04 | 5.1E-10               |                     |                        |  |
|                                      | hsa05205 | Proteoglycans in cancer                              |                                        | 9.9E-05 |         | 8.7E-04 |         |         | 6.7E-20               |                     |                        |  |
|                                      | hsa05206 | MicroRNAs in cancer                                  |                                        |         |         |         |         |         | 2.0E-07               |                     |                        |  |
|                                      | hsa05230 | Central carbon metabolism in cancer                  |                                        |         |         |         |         |         | 5.6E-10               |                     |                        |  |
|                                      | hsa05231 | Choline metabolism in cancer                         |                                        |         |         |         |         |         | 2.6E-08               |                     |                        |  |
| 6.9 Infectious diseases: Viral       | hsa05160 | Hepatitis C                                          |                                        |         |         |         |         | 4.2E-05 | 2.1E-04               |                     |                        |  |
|                                      | hsa05161 | Hepatitis B                                          |                                        |         |         |         |         | 1.0E-05 | 3.4E-04               |                     |                        |  |
|                                      | hsa05168 | Herpes simplex infection                             | 8.8E-05                                |         |         |         |         | 4.0E-05 |                       |                     |                        |  |
| 6.10 Infectious diseases: Parasitic  | hsa05145 | Toxoplasmosis                                        |                                        |         |         |         | 1.9E-04 |         |                       |                     |                        |  |
