# Supplementary material for: Identification of Entry Factors Involved in Hepatitis C Virus Infection Based on Host-Mimicking Short Linear Motifs
Source: PLoS Comput Biol. 2017 Jan 27;13(1):e1005368. doi: 10.1371/journal.pcbi.1005368 (PMC5302801; doi:10.1371/journal.pcbi.1005368)
Supplement: S1 Table — (XLSX) [file pcbi.1005368.s011.xlsx]

## Sheet: S1 Table
S1 Table. GO terms enriched in the virus-host PPI network modules and representative functions according to Revigo
Module (number of VIPs): representative functional types	Revigo representatives	Number of proteins	Enriched GO terms for biological process (p < 0.05)	Proteins
Module 1 (53): Actin cytoskeleton organization & Cell adhesion	PMA-inducible membrane protein ectodomain proteolysis	13	GO:0009896; GO:0042176; GO:0043087; GO:0045732; GO:0046578; GO:0051056; GO:0051088	ADAM10, ADAM17, ADAM9, ARHGEF7, DGKZ, DNMBP, FGD1, GIT2, ITCH, SCRIB, SGSM3, SH3D19, THY1
	cytoskeleton organization	11	GO:0007010; GO:0007015; GO:0030036	ACTA1, ANK1, DMD, EVL, FGD1, SEMA6A, SPTA1, THY1, VASP, WAS, WASL
	cell adhesion	10	GO:0007155	ADAM15, ADAM17, ADAM9, DLG5, PGM5, SCRIB, SDC3, SORBS3, THY1, VCL
	vesicle-mediated transport	10	GO:0016192	ANK1, CADPS2, DNM1, HIP1R, NOSTRIN, SH3D19, SNX1, SNX2, SPTBN2, WAS
	biological adhesion	10	GO:0022610	ADAM15, ADAM17, ADAM9, DLG5, PGM5, SCRIB, SDC3, SORBS3, THY1, VCL
	cellular component movement	9	GO:0006928	ADAM17, ARHGEF7, NOS3, PLAUR, SCRIB, SEMA6A, VASP, VCL, WASL
	actin filament-based process	7	GO:0030029	ACTA1, EVL, FGD1, SPTA1, VASP, WAS, WASL
	No enriched GO term	16	N/A	SORBS2, UTRN, CTTN, SNX9, AHNAK, ALB, CRB2, RDX, DTNA, FLOT1, SNTA1, NOXO1, MME, PLEC1, RAB5B, TULP3
Module 2 (19): Peptide hormone processing	peptide hormone processing	8	GO:0006508; GO:0016485; GO:0016486; GO:0051604	ADAM19, ADAMTS1, BACE1, FURIN, PCSK1, PCSK6, PCSK9, TPP2
	No enriched GO term	11	N/A	HLA-B, DSG3, EDA, SERPINB8, ABCC6, COL23A1, LDLR, LRP1, NAGPA, SORL1, VWF
Module 3 (55): Cellular homeostasis	cellular homeostasis	10	GO:0019725	ATP1A2, ATP5B, CALCA, CALR, GNAQ, KCNH2, PDIA6, PRDX2, TFRC, TXN
	No enriched GO term	45	N/A	BTK, GABARAP, ARG1, MC1R, ATP5A1, BRIX1, IGHM, NRD1, G3BP1, SSB, CTSA, DAAM1, DBN1, EEF1G, DSP, EIF6, ENO1, EWSR1, FAS, RASSF5, NSMAF, GBAS, GPC4, GPC6, VIM, HBEGF, HNRNPM, HSD17B10, KRT13, KRT33B, LGALS3BP, MDH2, MIF, PFN1, MTDH, YARS, PIP4K2B, PIP5K1A, PIP5K1C, POMC, TLR4, RFTN1, RPL7A, STBD1, TROVE2
Module 4 (78): Growth	regulation of growth	32	GO:0006874; GO:0006875; GO:0007166; GO:0007202; GO:0007264; GO:0010517; GO:0010518; GO:0010863; GO:0032101; GO:0032844; GO:0032846; GO:0040008; GO:0040012; GO:0043085; GO:0044093; GO:0048638; GO:0051480; GO:0055065; GO:0055074; GO:0060191; GO:0060193	ABCA1, ACE, AGRN, AGTR1, APOE, ARF1, ARF4, ARRB2, AVPR1A, AVPR1B, CALM1, CAV1, CFL1, CSNK2A1, CSNK2A2, FGF2, GAP43, GRK5, ICAM1, IGFBP3, IL16, MADD, PPBP, RGS19, RRAD, RUVBL1, SGPL1, SPP1, SPTBN1, TACR1, TGM2, UBA52
	blood circulation	13	GO:0001990; GO:0003013; GO:0003044; GO:0003073; GO:0008015; GO:0019229; GO:0044057; GO:0044062; GO:0048514; GO:0050886	ACE, AGTR1, APOE, AVPR1A, AVPR1B, CAV1, F5, FGF2, NCL, SGPL1, TACR1, TGM2, UBA52
	cellular di-, tri-valent inorganic cation homeostasis	7	GO:0030005	AGTR1, APOE, AVPR1A, AVPR1B, CAV1, TACR1, TGM2
	di-, tri-valent inorganic cation homeostasis	7	GO:0055066	AGTR1, APOE, AVPR1A, AVPR1B, CAV1, TACR1, TGM2
	regulation of natriuresis	3	GO:0003078	AGTR1, AVPR1A, TACR1
	No enriched GO term	44	N/A	ARRB1, AP3B1, AQP4, ARMCX3, ATP2B1, C1R, CABP1, CANX, MYO1C, CLIC1, CLTB, CSN1S1, XK, HDLBP, SET, PRCC, PLEKHO1, MFAP1, EPB41L2, CFDP1, CALU, P4HB, LAMC3, DLST, DOCK4, EMD, GLG1, GMFB, IFRD1, IGF2R, JUP, KPNB1, LGALS3, LRPPRC, LYZ, MAEA, NKTR, PDAP1, PNN, PPFIBP1, RAB11FIP5, SLC39A7, SULF2, VTN
Module 5 (225): Apoptosis & Cell junction organization	protein phosphorylation	149	GO:0000165; GO:0001932; GO:0001933; GO:0001934; GO:0002253; GO:0002429; GO:0002526; GO:0002684; GO:0002697; GO:0002703; GO:0002706; GO:0002709; GO:0002711; GO:0002757; GO:0002764; GO:0002768; GO:0002819; GO:0002822; GO:0006468; GO:0006796; GO:0006952; GO:0006954; GO:0006955; GO:0007166; GO:0007167; GO:0007178; GO:0007179; GO:0007249; GO:0007250; GO:0007264; GO:0007265; GO:0007266; GO:0007610; GO:…	ACVR1, ACVR1B, ACVR1C, ACVRL1, ADAP1, ADCY7, ADRBK2, AKT1, AKT2, AKT3, ANXA1, APOA1, APOB, APOH, APP, ARSA, AXIN1, BAMBI, BMPR2, BRAF, C1QBP, C4BPA, CAMK1G, CAMKK2, CARD11, CCDC88A, CCL14, CCNB1, CD44, CD81, CDC42, CDC42BPA, CDK5R1, CHUK, CLU, CNP, COL1A1, COL4A3BP, COLEC12, CSNK1D, CSNK1E, DCD, DPP4, DSCAM, DST, EDNRB, ENG, ESR1, FST, FSTL1, GAK, GCGR, GDF9, GDI2, GNA12, GNA13, GNAZ, GNB1, GNB3,…
	regulation of apoptotic process	113	GO:0001558; GO:0002700; GO:0002718; GO:0002724; GO:0002726; GO:0006605; GO:0006915; GO:0007155; GO:0008104; GO:0008219; GO:0008284; GO:0010810; GO:0010827; GO:0010828; GO:0010876; GO:0010941; GO:0010942; GO:0012501; GO:0012502; GO:0015031; GO:0017038; GO:0022407; GO:0030155; GO:0030308; GO:0032386; GO:0032388; GO:0032880; GO:0033157; GO:0033160; GO:0040008; GO:0042127; GO:0042981; GO:0043065; GO:…	ABCG8, ACVR1, ACVR1B, ACVR1C, ACVRL1, AKAP13, AKT1, AKT2, ANXA1, APOA1, APOB, APOH, APP, AXIN1, BMPR2, BRAF, CARD11, CCDC88A, CCL14, CD44, CD81, CDC42, CDHR2, CDK5R1, CIB1, CLTC, CLU, COL12A1, COL1A1, COL4A3BP, CRY2, CYTH1, DPP4, DSCAM, DST, EDNRB, ENG, ESR1, FADD, FLOT2, FST, GDF9, GDI2, GOPC, HSPA5, HSPA9, HSPB1, IKBKB, IKBKG, ITGA5, ITGB7, ITPR1, KPNA2, LAMC1, MAGED1, MAP3K5, MAP3K7, MAPK7, MA…
	cell junction organization	98	GO:0000902; GO:0000904; GO:0001525; GO:0001568; GO:0001569; GO:0001701; GO:0001763; GO:0001944; GO:0002521; GO:0002573; GO:0003006; GO:0006461; GO:0006873; GO:0006874; GO:0006875; GO:0007010; GO:0007281; GO:0007389; GO:0007409; GO:0008038; GO:0008360; GO:0008361; GO:0009792; GO:0010638; GO:0010769; GO:0021700; GO:0022604; GO:0030003; GO:0030030; GO:0030036; GO:0030099; GO:0030182; GO:0030501; GO:…	ABCG8, ACVR1, ACVR1B, ACVRL1, AKT1, ANXA1, APOA1, APOB, APP, AXIN1, BMPR2, BRAF, CARD11, CCDC88A, CCL14, CCNB1, CD44, CDC42, CDC42BPA, CDHR2, CDK5R1, CHUK, CLU, CNP, COL1A1, COL4A3BP, COLEC12, DSCAM, DST, EDNRB, ENG, FADD, FSCN1, FST, GDF9, GNA12, GNA13, GNB1, GOPC, HSP90AA1, HSPA4, IBTK, IKBKB, IKBKG, ITGA5, ITPR1, LAMC1, LASP1, LTF, MAP3K7, MAPT, MARK2, MAST2, MTOR, NCAM2, NF2, NRP1, NUMB, OCLN…
	phosphorus metabolism	56	GO:0006793	ACVR1, ACVR1B, ACVR1C, ACVRL1, ADRBK2, AKT1, AKT2, AKT3, APP, BMPR2, BRAF, CAMK1G, CAMKK2, CD81, CDC42BPA, CDK5R1, CHUK, COL4A3BP, CSNK1D, CSNK1E, GAK, GRK6, IKBKB, IRAK4, MAP3K5, MAP3K7, MAPK7, MARK2, MAST2, MTOR, NRBP1, PAK1, PDK1, PIM1, PLK3, PPP5C, PRKCB, PRKCD, PRKCI, PRKCZ, PRKD1, PRKD2, PRKD3, PRKG2, PSEN1, PTPRC, RPS6KB1, SCYL3, SGK1, STK38, TAOK2, TGFB1, TGFB3, TGFBR1, TGFBR2, TNF
	cell motility	55	GO:0006606; GO:0016192; GO:0016477; GO:0030334; GO:0034504; GO:0040012; GO:0042306; GO:0046907; GO:0048870; GO:0051170; GO:0051270; GO:0051674	ACVR1, ACVRL1, AKT1, APOA1, APOB, APOH, APP, CCDC88A, CD44, CDK5R1, CLTC, COLEC12, CRY2, CYTH1, DST, EDNRB, ENG, GCGR, GNA13, GOPC, HSP90AA1, HSPA9, ITGA5, KPNA2, LAMC1, NF2, NRBP1, NRP1, PARD3, PARD6B, PRKCI, PRKCZ, PSEN1, RAB13, RAB34, RAB3D, RAC1, RHOA, RPS6KB1, S1PR1, SCYL3, SLC1A3, SNX6, STX8, TAOK2, TGFB1, TGFB3, TGFBR1, TGFBR2, TMED2, TNF, TSC2, VAMP2, VEGFA, YWHAZ
	death	28	GO:0016265	ACVR1C, AKAP13, AKT1, APP, AXIN1, CIB1, CLU, FADD, HSPB1, ITPR1, MAGED1, MAP3K5, MAPK7, PAK1, PKM2, PPP3R1, PSEN1, RAC1, SGK1, TAOK2, TGFB1, TNF, TNFRSF1B, TRADD, TRAF2, TRAF3, TRAF6, VDAC1
	cellular component movement	27	GO:0006928	ACVR1, ACVRL1, ANXA1, APOA1, APOB, APP, CCDC88A, CD44, CDK5R1, EDNRB, ENG, GNA13, HSPB1, ITGA5, LAMC1, LSP1, NRP1, PSEN1, RAC1, RPS6KB1, SCYL3, TAOK2, TGFB1, TGFBR1, TNF, TPM3, TUBB
	biological adhesion	25	GO:0022610	APP, CD44, CDHR2, CDK5R1, CIB1, COL12A1, DSCAM, DST, ENG, FLOT2, ITGA5, ITGB7, LAMC1, NCAM2, NRP1, PARD3, PSEN1, PTPRC, RAB13, RAC1, RHOA, S1PR1, TAOK2, TNF, TRO
	cell proliferation	18	GO:0008283	APOA1, CD81, CDK5R1, COL4A3BP, FSCN1, FST, GNB1, NF2, NUMB, PIM1, PRKCD, PRKD1, PSEN1, PTPRC, RAC1, RPS27, TGFB1, VEGFA
	actin filament-based process	15	GO:0030029	CDC42, CDC42BPA, DST, FSCN1, NF2, PRKCI, PRKCZ, RAC1, RAC2, RAC3, RHOA, RHOJ, RHOQ, SHROOM3, TAOK2
	cellular di-, tri-valent inorganic cation homeostasis	13	GO:0030005	APP, CCL14, EDNRB, GNA13, GNB1, IBTK, ITPR1, LTF, PRKCB, PSEN1, PTPRC, S1PR1, TGFB1
	di-, tri-valent inorganic cation homeostasis	13	GO:0055066	APP, CCL14, EDNRB, GNA13, GNB1, IBTK, ITPR1, LTF, PRKCB, PSEN1, PTPRC, S1PR1, TGFB1
	cellular process involved in reproduction	12	GO:0048610	ACVR1, AKT1, ARSA, AXIN1, CCNB1, GDF9, MAST2, MTOR, PEBP1, RPS6KB1, TGFB1, TGFBR1
	mitotic interphase	7	GO:0051329	ACVR1, ACVR1B, AKT1, APP, CCNB1, KPNA2, PIM1
	cell recognition	6	GO:0008037	APP, ARSA, CDK5R1, COLEC12, NCAM2, NRP1
	activation of pro-apoptotic gene products	5	GO:0008633	AKT1, FADD, PPP3R1, TRADD, TRAF2
	bone remodeling	4	GO:0046849	RAC1, RAC2, TGFB1, TGFB3
	No enriched GO term	34	N/A	ABCB1, ABCG2, INHBC, IGSF1, THEM4, TCL1A, MAPKAP1, PEBP4, SLC16A4, CHN1, CES1, CLEC3B, CLIP3, FUCA1, GAPDH, GNB2L1, GOLGB1, HK1, HMMR, MAP3K7IP2, KIDINS220, LETM1, MARCKS, MYH1, MYO10, PI4K2B, PLCB3, PDLIM5, TTR, SLC39A1, PRSS1, RPL29, RABAC1, TRHDE
Module 6 (102): Endocytosis & cell-cell signaling	cell-cell signaling	35	GO:0007265; GO:0007267; GO:0007268; GO:0007611; GO:0007612; GO:0019226; GO:0044057; GO:0048167; GO:0050877	ADRA1B, AKAP5, APLP2, ARHGEF1, ATP1A1, ATP2B2, CACNA1B, CACNG2, CD9, DFNB31, DLG4, GABRB3, GRIN2A, GRIN2C, GRM7, IL18, KCND2, LIN7A, LRP2, MAP1A, MLLT4, MRAS, NRAS, NRXN1, NRXN3, PLCB1, PLD1, PRKCA, PTGIR, PVRL1, RAB3A, RALGDS, RRAS2, SDC4, SEMA4F
	cellular component morphogenesis	24	GO:0000902; GO:0010324; GO:0032989; GO:0043062; GO:0050808	AP1G1, APLP2, ATP2B2, CACNG2, CADM1, CD9, CYTH2, DLG1, DLG4, ERBB2IP, EZR, ITGB1, LRP2, LRP8, MARCH2, NLGN4X, NRAS, NRXN1, NRXN3, PRKCA, PVRL1, RAB3A, RIN1, SEMA4F
	endocytosis	21	GO:0006812; GO:0006813; GO:0006897; GO:0030001	AP1G1, ATP1A1, ATP2B2, ATP2B4, CACNA1B, CACNG2, CYTH2, DLG4, GRIN2A, KCNA2, KCNA4, KCND2, KCNE4, KCNJ2, KCNJ4, LRP2, LRP8, MARCH2, NRAS, RAB3A, RIN1
	cell adhesion	19	GO:0007155	ADAM22, AGGF1, CADM1, CASK, CD9, CTNNA1, DLG1, ERBB2IP, EZR, F11R, ITGB1, MLLT4, NLGN4X, NRXN1, NRXN2, NRXN3, PVRL1, PVRL2, SSX2IP
	biological adhesion	19	GO:0022610	ADAM22, AGGF1, CADM1, CASK, CD9, CTNNA1, DLG1, ERBB2IP, EZR, F11R, ITGB1, MLLT4, NLGN4X, NRXN1, NRXN2, NRXN3, PVRL1, PVRL2, SSX2IP
	behavior	17	GO:0007610; GO:0009628	ADRA1B, ANXA7, APLP2, ATP2B2, CASR, DLG4, GRIN2A, GRM7, IL18, LRP2, MEN1, NLGN4X, NRAS, PLCB1, PLD1, PRKCA, RAB3A
	cellular ion homeostasis	12	GO:0006873; GO:0019725; GO:0048878; GO:0050801; GO:0055082	ADRA1B, ANXA7, APLP2, ATP2B2, CACNG2, CASR, CD9, GNA15, GRIN2A, GRIN2C, KCND2, PRKCA
	No enriched GO term	38	N/A	ADD3, KIF13A, RAP1A, TANC1, CD163, CDKN2A, DGKD, TJAP1, GPR125, GDA, CNKSR2, SIPA1L1, SEMA4B, LRRC7, LRFN1, EXOC4, FZD4, EPB41, HLA-A, HMGB1, IL13RA1, ITPKB, RAP1GAP, PICK1, JAG1, SEMG2, SEMG1, SDPR, SCTR, INADL, ENTPD5, ADCY5, AKAP12, PTPRG, RGS7, SDC2, SLC6A9, TNFSF12
Module 7 (299): Receptor signaling & Cytoskeleton organization	enzyme linked receptor protein signaling pathway	235	GO:0000165; GO:0000187; GO:0000904; GO:0001501; GO:0001819; GO:0001910; GO:0001932; GO:0001934; GO:0002253; GO:0002429; GO:0002520; GO:0002521; GO:0002526; GO:0002683; GO:0002684; GO:0002694; GO:0002696; GO:0002697; GO:0002699; GO:0002703; GO:0002757; GO:0002764; GO:0002768; GO:0002819; GO:0002821; GO:0002822; GO:0002824; GO:0006873; GO:0006952; GO:0006953; GO:0006954; GO:0006955; GO:0006970; GO:…	A2M, ABCG5, ABL1, ACTB, ACTL6A, ACTN4, ADA, AGER, AGT, AHSG, ALK, AMBP, ANK3, ANXA2, ANXA6, AP2A1, AP2A2, AP2B1, APCS, ARHGAP1, ARHGAP5, ASAP2, AXL, B2M, BCAR1, BLNK, BRCA2, C3, C6, CALD1, CAPN1, CAPNS1, CBL, CCKBR, CCR3, CD164, CD19, CD247, CD274, CD33, CD59, CD63, CD79B, CD97, CDH2, CDKN1B, CEACAM1, CELSR2, CFH, CHRD, CHRND, CRK, CSE1L, CSF1, CSF1R, CSK, CUTA, CXCL2, DCC, DDR1, DDR2, DIRAS3, DL…
	cytoskeleton organization	105	GO:0000902; GO:0006461; GO:0007010; GO:0007015; GO:0007044; GO:0007568; GO:0010324; GO:0030030; GO:0030036; GO:0032271; GO:0032989; GO:0032990; GO:0034329; GO:0034330; GO:0043062; GO:0043623; GO:0048041; GO:0051014; GO:0051017; GO:0051291; GO:0070271	ABL1, ACTB, ACTN4, ADA, AGER, AGT, AHSG, ANK3, ANXA2, AP2A1, AP2A2, APCS, BCAR1, BIN1, BRCA2, CALD1, CDH2, CDKN1B, CELSR2, CRK, CSE1L, CUTA, DAG1, DCC, DNM2, DNM3, DOCK1, DRD3, DYNC1H1, EFNA5, EGFR, ELMO1, ELMO2, EPB41L1, EPB41L3, EPHB2, EPHB3, EPN1, ERBB2, ERBB3, ERBB4, FGFR1, FLNA, FLNB, GHR, GNAO1, GRB2, GSN, HCK, HRAS, HSPD1, HSPG2, HTT, IGF1R, IL1RAP, IL7R, INSR, ITGAV, ITPR3, ITSN1, KRAS, K…
	cell adhesion	63	GO:0007155; GO:0007160; GO:0016337; GO:0030155; GO:0031589	ABL1, ADA, AGT, AMBP, ARHGAP5, BCAR1, CCR3, CD164, CD22, CD33, CD97, CDH2, CEACAM1, CELSR2, CHRD, CSF1, DDR1, DDR2, EGFR, ERBB2, ERBB3, GP9, GSN, HSPG2, INPPL1, ITGA2B, ITGAV, ITGB5, LAMB2, MFAP4, MSN, MUC4, NEDD9, NFASC, NPHP1, PCDHA7, PCDHA9, PECAM1, PIK3R1, PKD1, PRLR, PSTPIP1, PTK2B, PTPRF, PTPRK, PXN, RASA1, RET, ROBO1, SCARB2, SIGLEC11, SIGLEC7, SIRPA, SORBS1, SRC, SRCIN1, STAB1, SYK, TLN2,…
	phosphorus metabolism	61	GO:0006793	ABL1, ALK, AXL, BMX, CSF1R, CSK, DAPP1, DDR1, DDR2, EGFR, ENPP3, EPHA2, EPHA3, EPHB2, EPHB3, ERBB2, ERBB3, ERBB4, FGFR1, FGFR2, FGFR3, FGFR4, FLT3, FLT4, FRS2, GAB1, GHR, HCK, IGF1R, INPPL1, INSR, KDR, KIT, MET, MYLK, P2RX7, PDGFRA, PDGFRB, PIK3C2B, PIK3CA, PIK3CG, PIK3R1, PRLR, PTK2B, PTPN11, PTPN13, PTPRA, PTPRF, PTPRH, PTPRK, PTPRZ1, RET, ROR1, ROS1, SHC1, SRC, SYK, SYNJ2, TIE1, TYRO3, ZAP70
	phosphatidylinositol phosphorylation	61	GO:0006796; GO:0016310; GO:0046834; GO:0046854	ABL1, ALK, AXL, BMX, CSF1R, CSK, DAPP1, DDR1, DDR2, EGFR, ENPP3, EPHA2, EPHA3, EPHB2, EPHB3, ERBB2, ERBB3, ERBB4, FGFR1, FGFR2, FGFR3, FGFR4, FLT3, FLT4, FRS2, GAB1, GHR, HCK, IGF1R, INPPL1, INSR, KDR, KIT, MET, MYLK, P2RX7, PDGFRA, PDGFRB, PIK3C2B, PIK3CA, PIK3CG, PIK3R1, PRLR, PTK2B, PTPN11, PTPN13, PTPRA, PTPRF, PTPRH, PTPRK, PTPRZ1, RET, ROR1, ROS1, SHC1, SRC, SYK, SYNJ2, TIE1, TYRO3, ZAP70
	endocytosis	56	GO:0006897; GO:0006909; GO:0016192; GO:0030100; GO:0045807; GO:0051674; GO:0060627	ACTN4, AHSG, AP2A1, AP2A2, AP2B1, BCAR1, BIN1, C3, CBL, CD63, CDH2, CEACAM1, DCC, DNM2, DNM3, DOCK1, DRD3, ELMO1, ELMO2, EPN1, FLNA, GAB2, GHR, GSN, HCK, HRAS, HTT, IL6R, ITGAV, ITSN1, KDR, KIT, KRAS, KRT18, MET, MSN, NCK1, P2RX7, PDGFRB, PLD2, PPAP2B, PTK2B, PTPRK, RAB5A, RET, ROBO1, S100A9, SCIN, SDCBP, SRC, SRCIN1, STAB1, STON2, SYK, TNS1, VCAM1
	peptidyl-tyrosine modification	54	GO:0006468; GO:0018108; GO:0018212; GO:0042976; GO:0046777; GO:0050730; GO:0050731	ABL1, AGT, ALK, AXL, BMX, CSF1R, CSK, DDR1, DDR2, EGFR, EPHA2, EPHA3, EPHB2, EPHB3, ERBB2, ERBB3, ERBB4, FGFR1, FGFR2, FGFR3, FGFR4, FLT3, FLT4, FRS2, GAB1, GHR, HCK, IGF1R, IL6R, IL6ST, INSR, KDR, KIT, MET, MYLK, P2RX7, PDGFRA, PDGFRB, PIK3CA, PIK3CG, PRLR, PTK2B, PTPN11, PTPRA, RET, ROR1, ROS1, SHC1, SRC, SYK, TIE1, TNFRSF14, TYRO3, ZAP70
	biological adhesion	53	GO:0022610	ABL1, AGT, AMBP, ARHGAP5, BCAR1, CCR3, CD164, CD22, CD33, CD97, CDH2, CEACAM1, CELSR2, DDR1, DDR2, EGFR, GP9, HSPG2, INPPL1, ITGA2B, ITGAV, ITGB5, LAMB2, MFAP4, MSN, MUC4, NEDD9, NFASC, NPHP1, PCDHA7, PCDHA9, PECAM1, PKD1, PSTPIP1, PTK2B, PTPRF, PTPRK, PXN, RET, ROBO1, SCARB2, SIGLEC11, SIGLEC7, SIRPA, SORBS1, SRC, STAB1, SYK, TLN2, TRIP6, TYRO3, VCAM1, ZYX
	cellular component movement	36	GO:0006928	ACTB, ANK3, BCAR1, CALD1, CD97, CDH2, CEACAM1, DCC, EFNA5, ELMO1, EPHB2, EPHB3, ERBB2, GAB2, IL6R, KDR, KIT, MET, MSN, NCK1, NFASC, PDGFRB, PPAP2B, PTK2B, PTPRK, RET, ROBO1, S100A9, SDCBP, SH2B1, SRC, STAT3, SYK, TLN1, TNS1, VCAM1
	cell proliferation	27	GO:0008283	AGT, BCAR1, BIN1, BRCA2, CCKBR, CD274, CSE1L, CSF1, CSF1R, EGFR, EPS15, ERBB2, ERBB4, FRS2, GAB1, HSPD1, IL7R, KIT, MET, MPL, NOS2, P2RX7, PRG4, PTK2B, RBP4, SRC, SYK
	actin filament-based process	26	GO:0030029	ABL1, ACTN4, BCAR1, CALD1, CRK, ELMO1, EPB41L1, EPB41L3, FLNA, FLNB, GSN, HRAS, KRAS, MYH11, NCK1, NEDD9, NISCH, NPHP1, PLEK2, PTK2B, S100A9, SCIN, SDCBP, SORBS1, TLN1, VIL1
	cell activation	21	GO:0001775	ADA, AGT, BLNK, CSF1, EGFR, FLT3, HSPD1, IL7R, NCK1, NFAM1, P2RX7, PDGFRA, PIK3R1, PLSCR1, PRLR, SYK, TLR2, TLR3, TSHR, VCAM1, ZAP70
	di-, tri-valent inorganic cation homeostasis	15	GO:0055066	CCKBR, CCR3, DRD3, HP, HTT, IL6ST, ITPR3, KDR, OXT, P2RX7, PTK2B, SRI, TF, TRPC6, TRPV4
	cellular di-, tri-valent inorganic cation homeostasis	13	GO:0030005	CCKBR, CCR3, DRD3, HP, IL6ST, ITPR3, OXT, P2RX7, PTK2B, SRI, TF, TRPC6, TRPV4
	growth	12	GO:0040007	BRCA2, CHRND, FGFR1, FGFR2, FGFR3, GSN, IL7R, LAMB2, NOTCH3, PTPN11, SHBG, SLC1A2
	regulation of anti-apoptosis	7	GO:0045767	ERBB4, IL6R, IL6ST, PIK3R2, PTK2B, RASA1, RTN4
	positive regulation of anti-apoptosis	5	GO:0045768	ERBB4, IL6R, IL6ST, PTK2B, RASA1
	No enriched GO term	33	N/A	TGOLN2, TUB, LRBA, DKKL1, AKAP2, ALDH6A1, ANK2, SLA, OGN, IRS4, DEF6, DNASE1L2, FHIT, FXYD6, GC, SLCO2A1, PON2, NEU3, IL3RA, KRT17, KRT32, MYO1B, SLC23A1, PPFIBP2, SLAMF6, RAI14, RHBG, SERPINA4, PAFAH1B2, KCND3, TSLP, IL22RA1, VPS11
Module 8 (64) (no enriched function)	No enriched GO term	64	N/A	ADAP2, AHCYL1, AMOT, ANXA13, AR, ASPSCR1, ATP1B1, ATP6V1E1, CCL3, CCL4, CD36, CDH1, CDH3, CFTR, CLCN5, CTNNB1, DSCAML1, DVL1, EBAG9, EFEMP2, EPB49, FN1, GRIN2D, HAX1, IDE, IGF2, IQGAP1, ISG15, KCNB1, LAPTM4B, MAGI1, MAGI3, MERTK, NEDD4, NEDD4L, NPHS1, NR3C1, NRCAM, PAWR, PLXNB3, PRRG1, PRRG2, PTEN, PTPRB, PTPRE, RAPGEF2, RAPGEF6, SCAMP3, SCNN1A, SERPINF1, SLC23A2, SLC38A3, SLC9A1, SLC9A3R2, SNAP2…
